# Supplementary material for: Interface engineering of Zn3V2O8 decorated hydroxyapatite nanocomposite for photocatalytic degradation of Congo red dye and anti-microbial applications
Source: Royal Society of Chemistry journal article supplement (doi:10.1039/d4nj01983k), 2024-01-01
Supplement: d4nj01983k1.pdf [file d4nj01983k1.pdf]

## Supporting Information

### Interface Engineering of $\text{Zn}_3\text{V}_2\text{O}_8$ decorated Hydroxyapatite Nanocomposite for Photocatalytic Degradation of Congo Red dye and Anti-Microbial Applications

*I. Betsy Elizabeth*<sup>a</sup>, *Elaiyappillai Elanthamilan*<sup>b</sup>, *Sea-Fue Wang*<sup>b,\*</sup>, *I. Sharmila Lydia*<sup>a,\*</sup>,

<sup>a</sup>Department of Chemistry, Bishop Heber College (Autonomous), Affiliated to Bharathidasan

University, Tiruchirappalli-620017, Tamil Nadu, India.

<sup>b</sup>Department of Materials and Mineral Resources Engineering, National Taipei University of

Technology, No. 1, Sec. 3, Chung-Hsiao East Rd., Taipei 106, Taiwan.

---

#### Corresponding Authors

*Prof. Sea-Fue Wang*

*Email: sfwang@ntut.edu.tw*

*Dr. I. Sharmila Lydia*

*Email: sharmilalydia1966@gmail.com*

---

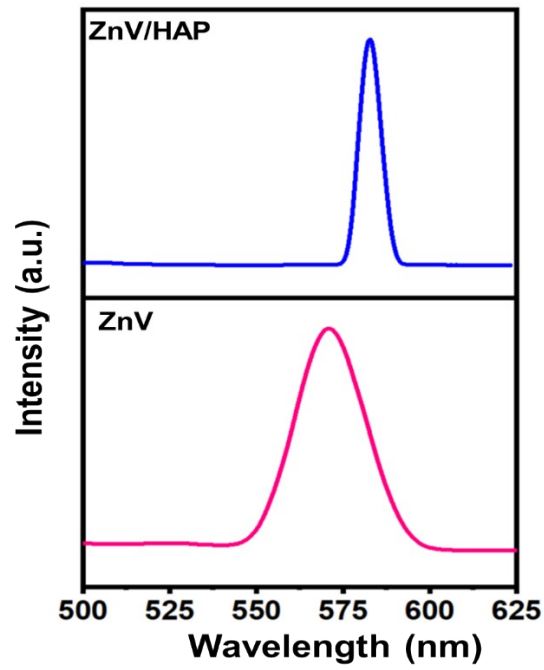

Fig.S1. Photoluminescence spectra of ZnV and ZnV/HAP composite

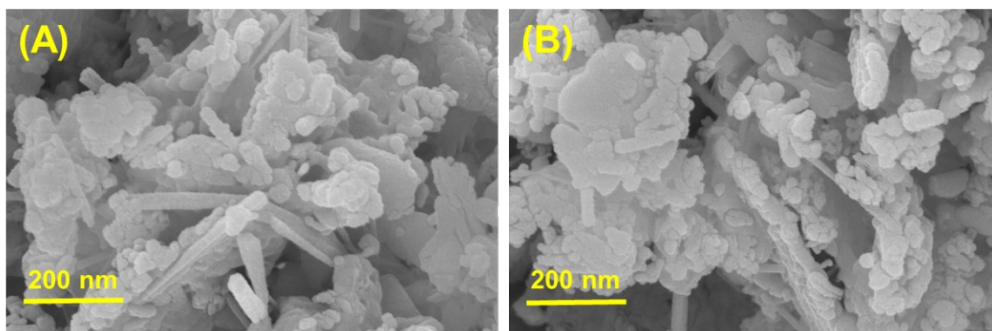

Fig. S2. (A and B) SEM images of HAP

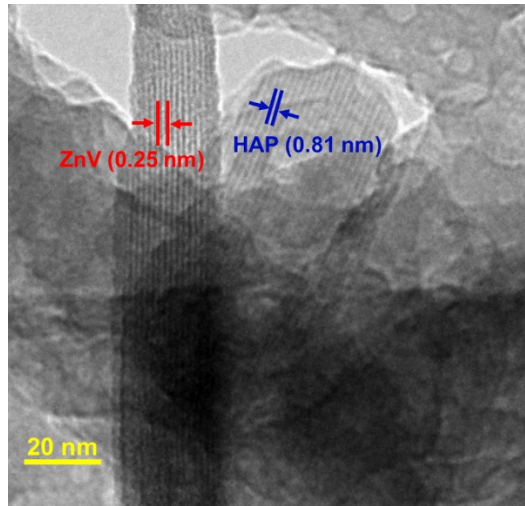

**Fig.S3. TEM image of ZnV/HAP composite with lattice spacing of ZnV and HAP**

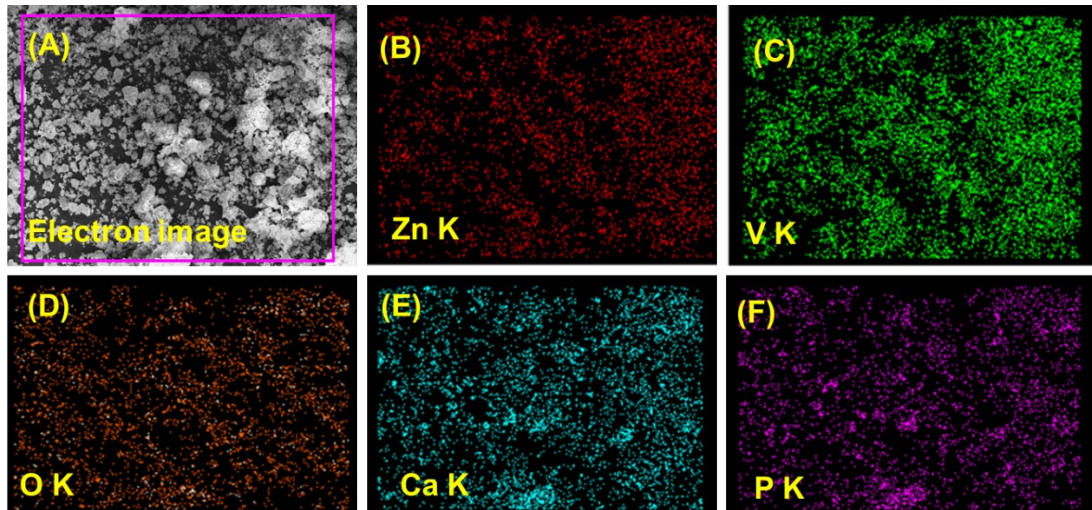

**Fig. S4. EDS color mapping analysis of ZnV/HAP composite**

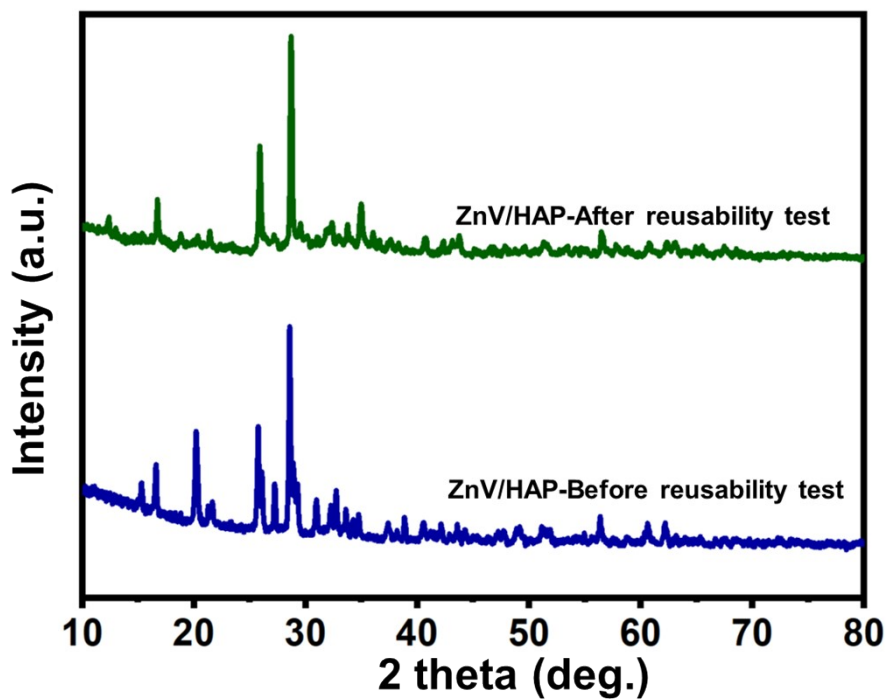

Fig.S5. XRD patterns of ZnV/HAP composite before and after reusability analysis

**Table S1. Comparison of photocatalytic performance of ZnV/HAP towards degradation of CR dye with other investigated materials**

| S. No | Catalysts                                             | % of degradation | Ref.      |
|-------|-------------------------------------------------------|------------------|-----------|
| 1.    | Ni-TiO <sub>2</sub>                                   | 92.3 %           | [1]       |
| 2.    | CuO NPs                                               | 91%              | [2]       |
| 3.    | SnO <sub>2</sub> -Fe <sub>3</sub> O <sub>4</sub>      | 50.7 %           | [3]       |
| 4.    | CMCFO-Cr                                              | 84%              | [4]       |
| 5.    | CoFe <sub>2</sub> O <sub>4</sub>                      | 79%              | [5]       |
| 6.    | CuFe <sub>2</sub> O <sub>4</sub>                      | 92%              | [6]       |
| 7.    | ZnO                                                   | 82%              | [7]       |
| 8.    | Co <sub>3</sub> O <sub>4</sub> / TiO <sub>2</sub> /GO | 91%              | [8]       |
| 9.    | ZnV/HAP                                               | 94%              | This work |

## References

1. K. Indira, S. Shanmugam, A. Hari, S. Vasantharaj, S. Sathiyavimal, K. Brindhadevi, A. El Askary, A. Elfasakhany and A. Pugazhendhi, *Environ. Res.* 2021, **202**, 111647.
2. K. Alsamhary, N. M. Al-Enazi, E. Alhomaidi and S. Alwakeel, *Environ. Res.* 2022, **207**, 112172.
3. M. Said, W.T Rizki, W. R. Asri, D. Desnelli, A. Rachmat and P. L. Hariani, *Heliyon*, 2022, **8**, e09204.
4. A. Selmi, H. Teymourinia, A. Zarei, M. Timoumi and A. Ramazani, *Iran. J. Catal.* 2022, **12**, 97–106.
5. L. Wang, J. Li, Y. Wang, L. Zhao and Q. Jiang, *Chem. Eng. J.* 2012, **181–182**, 72–79.

6. N. M. Mahmoodi, *Desalination*, 2011, **279**, 332–337.
7. J. Fowsiya, G. Madhumitha, N. A. Al-Dhabi and M. V. Arasu, *J. Photochem. Photobiol. B Biol.* 2016, **162**, 395–401.
8. W. K. Jo, S. Kumar, M. A. Isaacs, A. F. Lee and S. Karthikeyan, *Appl. Catal. B Environ.* 2017, **201**, 159–168.
